# Supplementary material
Source: PubMed Central journal article supplement (PMC3078019)
Supplement: supp_jn.111.138172_nut138172T1-3.pdf [file supp_jn.111.138172_nut138172T1-3.pdf]

**SUPPLEMENTAL TABLE 1**

Feed intake over the experimental period in control or arginine-treated ewes carrying multiple fetuses<sup>1</sup>

| Week of pregnancy | Feed intake                   |                           |
|-------------------|-------------------------------|---------------------------|
|                   | Control (n = 14)              | Arginine (n = 20)         |
|                   | <i>g/(kg body weight · d)</i> |                           |
| 6                 | 17.3 ± 0.22 <sup>c</sup>      | 17.5 ± 0.37 <sup>e</sup>  |
| 7                 | 17.5 ± 0.30 <sup>c</sup>      | 17.5 ± 0.30 <sup>e</sup>  |
| 8                 | 17.6 ± 0.37 <sup>c</sup>      | 17.5 ± 0.35 <sup>e</sup>  |
| 9                 | 17.2 ± 0.31 <sup>c</sup>      | 17.4 ± 0.33 <sup>e</sup>  |
| 10                | 17.2 ± 0.29 <sup>c</sup>      | 17.1 ± 0.30 <sup>fe</sup> |
| 11                | 16.7 ± 0.26 <sup>dc</sup>     | 16.7 ± 0.27 <sup>fg</sup> |
| 12                | 16.5 ± 0.26 <sup>d</sup>      | 16.8 ± 0.28 <sup>fg</sup> |
| 13                | 16.5 ± 0.22 <sup>d</sup>      | 16.5 ± 0.25 <sup>g</sup>  |
| 14                | 16.1 ± 0.24 <sup>d</sup>      | 16.2 ± 0.26 <sup>g</sup>  |
| 15                | 25.8 ± 0.43 <sup>a</sup>      | 26.2 ± 0.57 <sup>a</sup>  |
| 16                | 25.7 ± 0.46 <sup>a</sup>      | 25.2 ± 0.44 <sup>b</sup>  |
| 17                | 24.8 ± 0.34 <sup>b</sup>      | 24.6 ± 0.35 <sup>c</sup>  |
| 18                | 24.8 ± 0.50 <sup>b</sup>      | 24.3 ± 0.40 <sup>cd</sup> |
| 19                | 24.8 ± 0.49 <sup>b</sup>      | 24.6 ± 0.44 <sup>c</sup>  |
| 20                | 24.1 ± 0.55 <sup>b</sup>      | 24.2 ± 0.52 <sup>cd</sup> |
| 21                | 24.8 ± 0.71 <sup>b</sup>      | 23.9 ± 0.52 <sup>d</sup>  |

<sup>1</sup>Data are means ± SEM. Means in a column with superscripts without a common letter differ,  $P < 0.05$ .

**SUPPLEMENTAL TABLE 2**

Body weights of control and arginine-treated ewes from weeks  
6 to 21 of pregnancy<sup>1</sup>

| Week of pregnancy | Body weight of ewes      |                          |
|-------------------|--------------------------|--------------------------|
|                   | Control<br>(n = 14)      | Arginine<br>(n = 20)     |
|                   | <i>kg</i>                |                          |
| 6                 | 68.2 ± 1.5 <sup>k</sup>  | 68.8 ± 2.2 <sup>k</sup>  |
| 7                 | 67.0 ± 1.7 <sup>k</sup>  | 66.5 ± 2.0 <sup>k</sup>  |
| 8                 | 67.8 ± 1.9 <sup>k</sup>  | 67.2 ± 2.0 <sup>jk</sup> |
| 9                 | 69.0 ± 1.8 <sup>jk</sup> | 68.6 ± 2.0 <sup>ij</sup> |
| 10                | 70.8 ± 1.7 <sup>ij</sup> | 70.6 ± 1.9 <sup>hi</sup> |
| 11                | 72.5 ± 1.9 <sup>hi</sup> | 72.6 ± 2.0 <sup>gh</sup> |
| 12                | 74.1 ± 1.8 <sup>gh</sup> | 73.7 ± 1.9 <sup>fg</sup> |
| 13                | 75.6 ± 1.8 <sup>fg</sup> | 75.2 ± 1.9 <sup>ef</sup> |
| 14                | 76.5 ± 1.6 <sup>ef</sup> | 76.5 ± 1.9 <sup>de</sup> |
| 15                | 77.8 ± 1.5 <sup>e</sup>  | 78.1 ± 1.9 <sup>d</sup>  |
| 16                | 81.1 ± 1.7 <sup>d</sup>  | 81.6 ± 2.0 <sup>c</sup>  |
| 17                | 83.5 ± 1.6 <sup>c</sup>  | 84.3 ± 2.1 <sup>b</sup>  |
| 18                | 83.4 ± 2.1 <sup>c</sup>  | 85.2 ± 2.3 <sup>b</sup>  |
| 19                | 85.6 ± 2.2 <sup>bc</sup> | 87.6 ± 2.5 <sup>a</sup>  |
| 20                | 86.9 ± 3.0 <sup>ab</sup> | 87.7 ± 2.9 <sup>a</sup>  |
| 21                | 86.8 ± 3.8 <sup>ab</sup> | 89.9 ± 3.5 <sup>a</sup>  |

<sup>1</sup>Data are means ± SEM. Means in a column with superscripts without a common letter differ,  $P < 0.05$ .

SUPPLEMENTAL TABLE 3

Concentrations of amino acids in serum on d 100, 121 and 140 of pregnancy in control ewes with different litter sizes<sup>1</sup>

| Amino acid    | Day of pregnancy      |                       |                       | <i>P</i> value | Litter size            |                       |                        | <i>P</i> value |
|---------------|-----------------------|-----------------------|-----------------------|----------------|------------------------|-----------------------|------------------------|----------------|
|               | 100<br>(n = 14)       | 121<br>(n = 14)       | 140<br>(n = 14)       |                | Twins<br>(n = 3)       | Triplets<br>(n = 7)   | Quadruplets<br>(n = 4) |                |
|               | $\mu\text{mol/L}$     |                       |                       |                | $\mu\text{mol/L}$      |                       |                        |                |
| Aspartate     | 4.8 ± 0.6             | 4.3 ± 0.6             | 4.5 ± 0.8             | 0.57           | 5.1 ± 1                | 4.8 ± 0.7             | 3.8 ± 1                | 0.62           |
| Glutamate     | 84 ± 4 <sup>b</sup>   | 108 ± 4 <sup>a</sup>  | 47 ± 6 <sup>c</sup>   | <0.01          | 89 ± 6                 | 81 ± 4                | 68 ± 6                 | 0.07           |
| Asparagine    | 39 ± 3 <sup>a</sup>   | 29 ± 3 <sup>b</sup>   | 29 ± 4 <sup>ab</sup>  | 0.04           | 34 ± 5                 | 34 ± 3                | 28 ± 5                 | 0.57           |
| Serine        | 65 ± 5                | 66 ± 4                | 54 ± 6                | 0.14           | 61 ± 7                 | 67 ± 5                | 58 ± 7                 | 0.58           |
| Glutamine     | 189 ± 10 <sup>a</sup> | 136 ± 10 <sup>b</sup> | 221 ± 15 <sup>a</sup> | <0.01          | 194 ± 13               | 189 ± 9               | 163 ± 15               | 0.26           |
| Histidine     | 36 ± 3                | 37 ± 3                | 39 ± 3                | 0.61           | 36 ± 5                 | 35 ± 3                | 41 ± 4                 | 0.62           |
| Glycine       | 369 ± 23              | 342 ± 23              | 343 ± 37              | 0.50           | 391 ± 42               | 292 ± 26              | 372 ± 38               | 0.10           |
| Threonine     | 76 ± 9 <sup>a</sup>   | 71 ± 8 <sup>a</sup>   | 42 ± 11 <sup>b</sup>  | 0.03           | 77 ± 15                | 47 ± 10               | 65 ± 14                | 0.27           |
| Citrulline    | 114 ± 12              | 114 ± 11              | 88 ± 15               | 0.20           | 128 ± 20               | 98 ± 13               | 90 ± 19                | 0.37           |
| Arginine      | 144 ± 8               | 149 ± 8               | 157 ± 9               | 0.17           | 154 ± 15               | 139 ± 10              | 157 ± 13               | 0.49           |
| β-Alanine     | 10 ± 1 <sup>b</sup>   | 12 ± 1 <sup>a</sup>   | 14 ± 1 <sup>a</sup>   | <0.01          | 11 ± 2                 | 12 ± 1                | 13 ± 2                 | 0.76           |
| Taurine       | 133 ± 9 <sup>a</sup>  | 99 ± 9 <sup>b</sup>   | 95 ± 12 <sup>b</sup>  | <0.01          | 110 ± 15               | 97 ± 10               | 120 ± 14               | 0.42           |
| Alanine       | 159 ± 17              | 157 ± 17              | 153 ± 22              | 0.94           | 147 ± 31 <sup>ab</sup> | 211 ± 21 <sup>a</sup> | 111 ± 29 <sup>b</sup>  | 0.04           |
| Tyrosine      | 67 ± 9                | 70 ± 9                | 60 ± 13               | 0.75           | 52 ± 16 <sup>b</sup>   | 96 ± 11 <sup>a</sup>  | 50 ± 15 <sup>b</sup>   | 0.04           |
| Tryptophan    | 28 ± 3                | 28 ± 3                | 24 ± 4                | 0.47           | 29 ± 5                 | 29 ± 3                | 22 ± 4                 | 0.48           |
| Methionine    | 14 ± 2                | 15 ± 1                | 14 ± 2                | 0.73           | 13 ± 3                 | 16 ± 2                | 15 ± 2                 | 0.67           |
| Valine        | 94 ± 10               | 98 ± 10               | 93 ± 12               | 0.88           | 83 ± 18                | 107 ± 12              | 93 ± 16                | 0.51           |
| Phenylalanine | 34 ± 3                | 37 ± 3                | 36 ± 3                | 0.37           | 33 ± 5                 | 38 ± 3                | 36 ± 5                 | 0.73           |
| Isoleucine    | 57 ± 7                | 68 ± 6                | 76 ± 9                | 0.24           | 51 ± 8 <sup>b</sup>    | 87 ± 5 <sup>a</sup>   | 63 ± 8 <sup>b</sup>    | 0.03           |
| Leucine       | 77 ± 8 <sup>b</sup>   | 92 ± 8 <sup>a</sup>   | 103 ± 10 <sup>a</sup> | 0.04           | 77 ± 14                | 99 ± 9                | 96 ± 13                | 0.44           |
| Ornithine     | 50 ± 5 <sup>a</sup>   | 43 ± 5 <sup>a</sup>   | 28 ± 7 <sup>b</sup>   | 0.02           | 48 ± 9                 | 34 ± 6                | 39 ± 8                 | 0.46           |
| Lysine        | 100 ± 9 <sup>a</sup>  | 89 ± 9 <sup>ab</sup>  | 71 ± 12 <sup>b</sup>  | 0.04           | 84 ± 17                | 83 ± 11               | 93 ± 15                | 0.87           |
| Cysteine      | 93 ± 2 <sup>a</sup>   | 87 ± 2 <sup>b</sup>   | 82 ± 3 <sup>b</sup>   | <0.01          | 101 ± 4 <sup>a</sup>   | 86 ± 3 <sup>b</sup>   | 75 ± 4 <sup>c</sup>    | <0.01          |
| Proline       | 109 ± 2 <sup>a</sup>  | 99 ± 2 <sup>b</sup>   | 88 ± 2 <sup>c</sup>   | <0.01          | 124 ± 4 <sup>a</sup>   | 94 ± 3 <sup>b</sup>   | 78 ± 4 <sup>c</sup>    | <0.01          |

<sup>1</sup>Data are means ± SEM. Means in a row with superscripts without a common letter differ, *P* < 0.05.
